# Supplementary material for: Raising the (metastable) bar: 100% photo-switching in [Pd(Bu4dien)(η1-NO2)]+ approaches ambient temperature
Source: Royal Society of Chemistry journal article supplement (doi:10.1039/c5ce02434j), 2016-01-01
Supplement: c5ce02434j1.pdf [file c5ce02434j1.pdf]

# Raising the (Metastable) Bar: 100% Photo-switching in [Pd(Bu<sub>4</sub>dien)( $\eta^1$ -NO<sub>2</sub>)]<sup>+</sup> Approaches Ambient Temperature

Lauren E. Hatcher<sup>a\*</sup>

<sup>a</sup> *Department of Chemistry, University of Bath, Bath, BA2 7AY, UK*

## SUPPLEMENTARY INFORMATION

### Contents

**Figure S1** Single-crystal X-ray structure for the Pd(II) cation in **(1)** in the ground state

**Figure S2** Void space occupied by the THF solvent molecule in one unit cell of **(1)**

### Packing Coefficient Calculations

**Figure S3** Close-contact intermolecular C-H...O interactions to the nitrite ligand

**Figure S4** UV/vis diffuse reflectance spectrum of **(1)**

**Figure S5** Single-crystal X-ray structure for the Pd(II) cation in **(1)** in the metastable state

**Table S1** Nitro : nitrito occupancy ratios as a function of irradiation time at 100 K

**Table S2** Nitro : nitrito occupancy ratios as a function of temperature after 60 min steady-state photo-excitation (MS limit search)

**Figure S6** Single-crystal packing diagram (one unit cell) for the MS structure of **(1)**

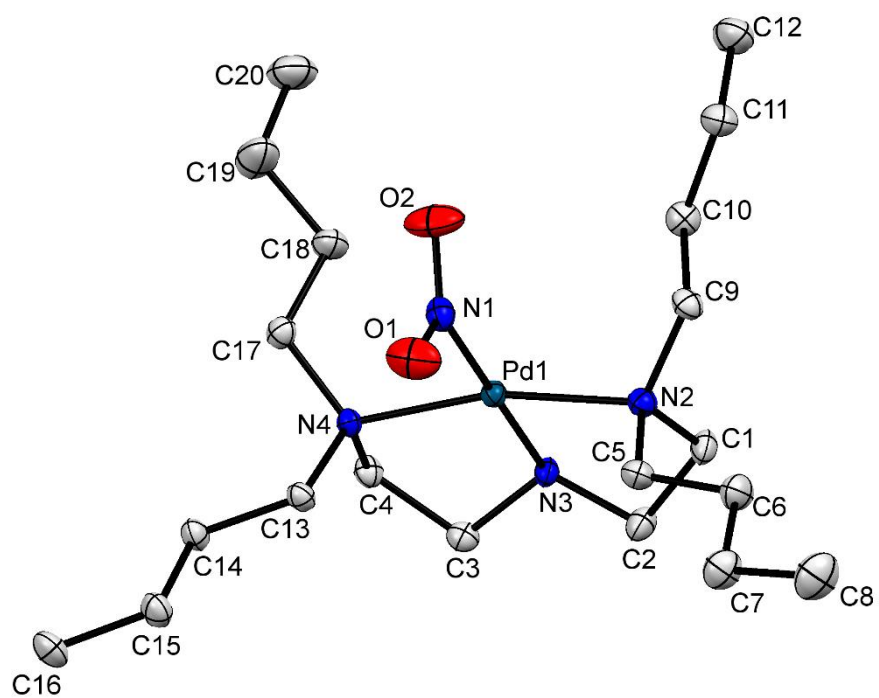

**Figure S1.** Single-crystal X-ray structure for the Pd(II) cation in (**1**) in the ground state. Ellipsoids shown at 50% probability and hydrogen atoms omitted for clarity

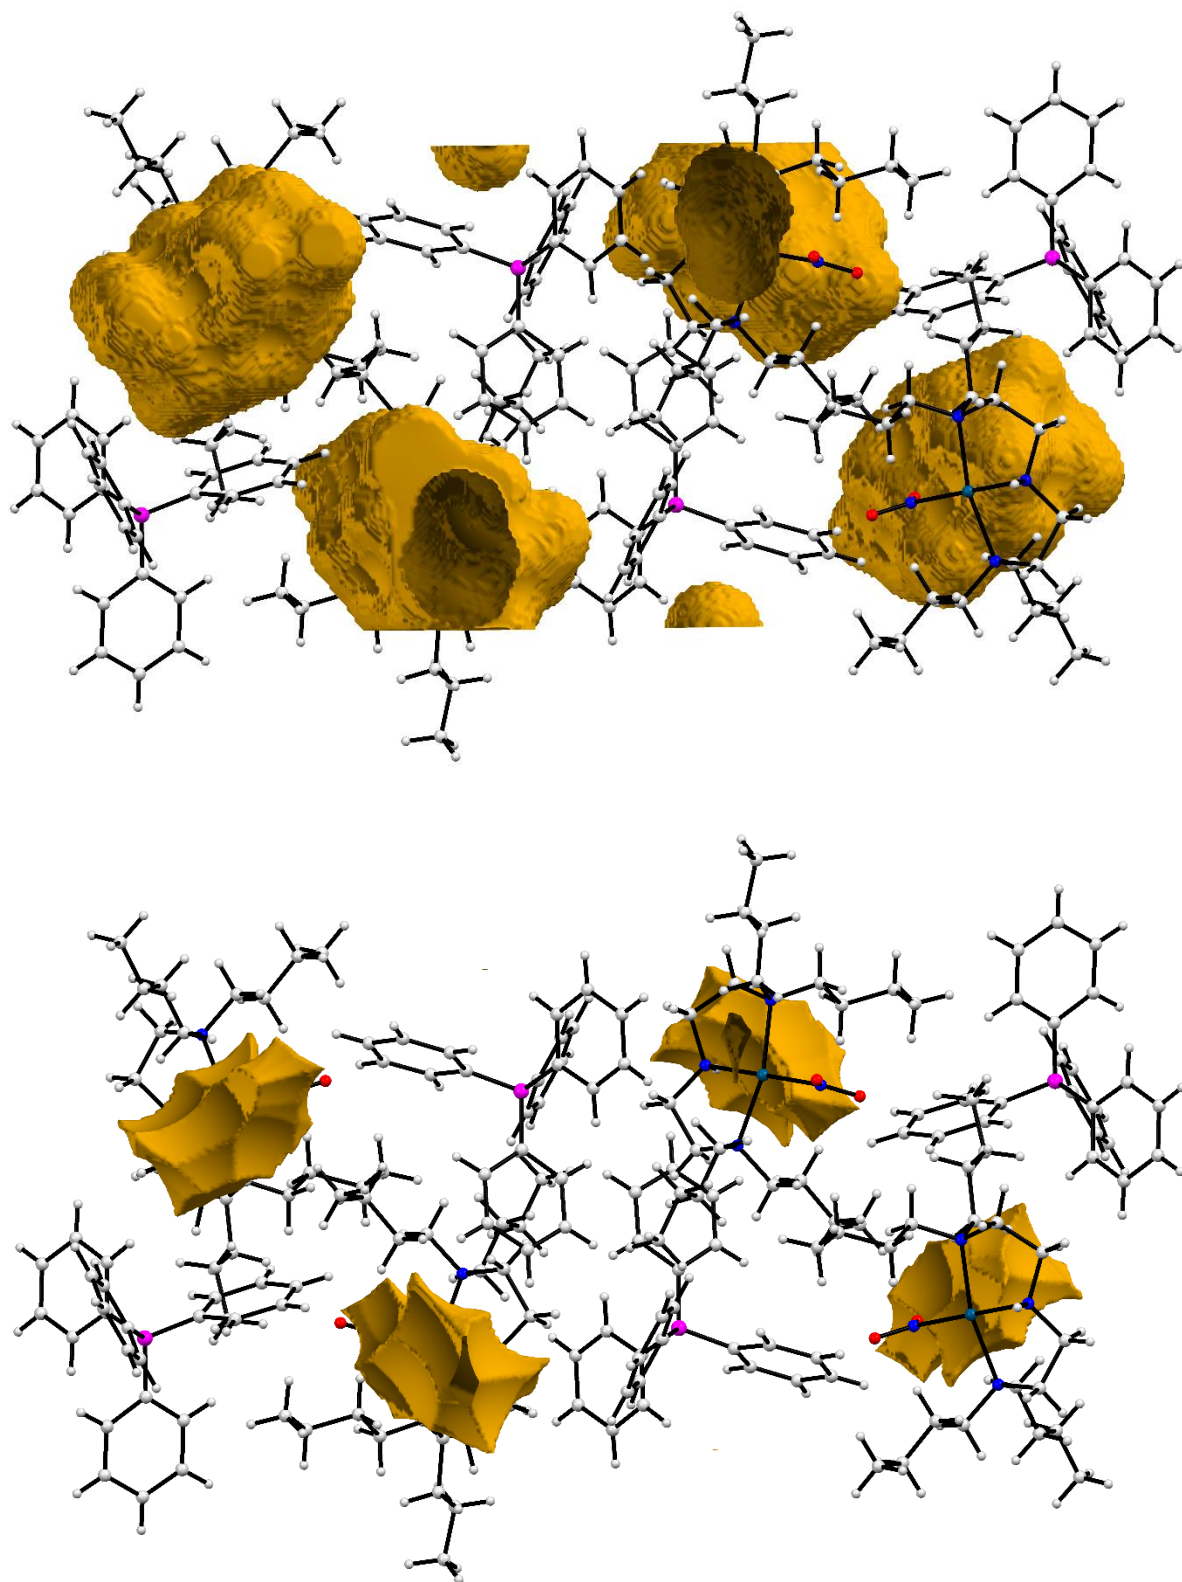

**Figure S2.** Void space occupied by the THF solvent molecule in one unit cell of **(1)**: *top* = contact surface void space; *bottom*: solvent-accessible void space. Calculations conducted in Mercury<sup>1</sup> using a probe radius of 1.2 Å and grid spacing of 0.1 Å

## Crystal Packing Coefficient Calculation

Molecular volumes by Hirshfeld Stockholder Partitioning (Crystal Explorer<sup>2, 3</sup>):

| Fragment    | Molecular volume / Å <sup>3</sup> |
|-------------|-----------------------------------|
| Cation      | 580.81                            |
| Anion       | 432.68                            |
| THF solvent | 111.41                            |
| <b>SUM</b>  | <b>1124.9</b>                     |

$$\text{Packing coefficient} = \frac{\text{Molecular volume} \times Z}{\text{Unit cell volume}} = \frac{1124.9 \times 4}{4578.4} = \mathbf{0.98}$$

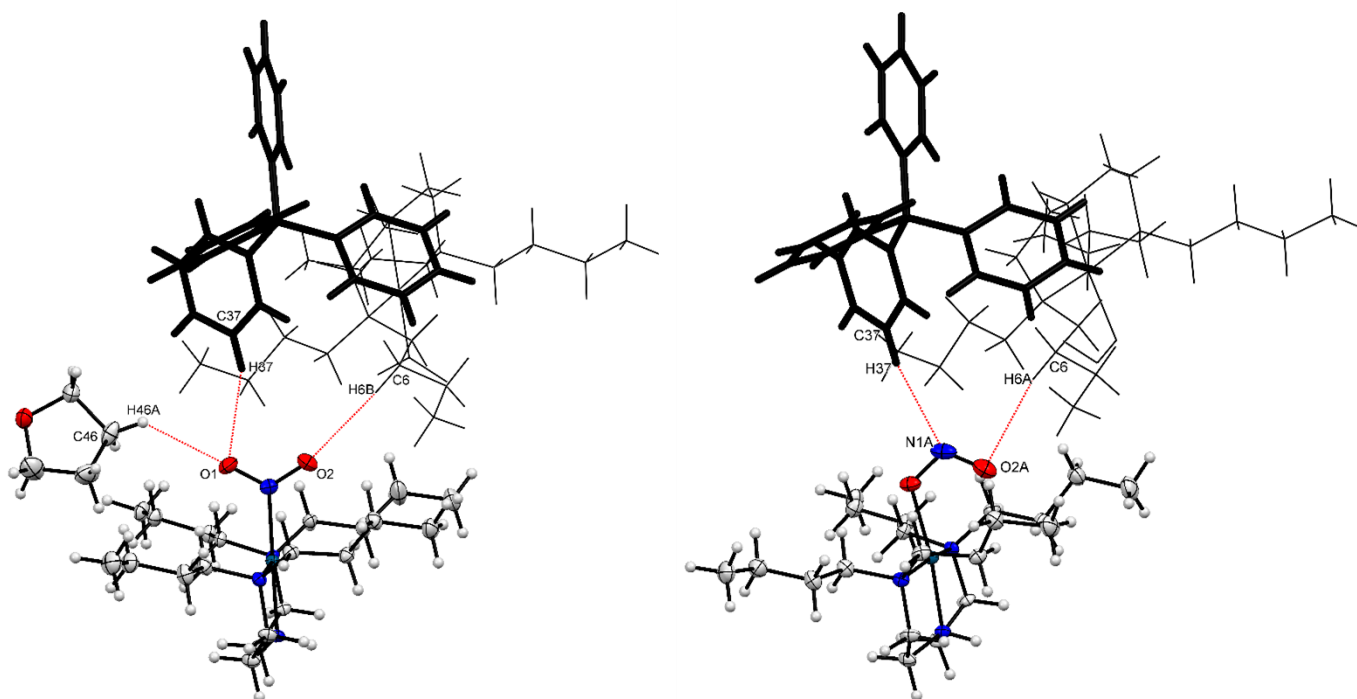

**Figure S3.** Close-contact intermolecular C-H...O interactions to the nitrite ligand in the GS (left) and MS (right) single-crystal X-ray structures

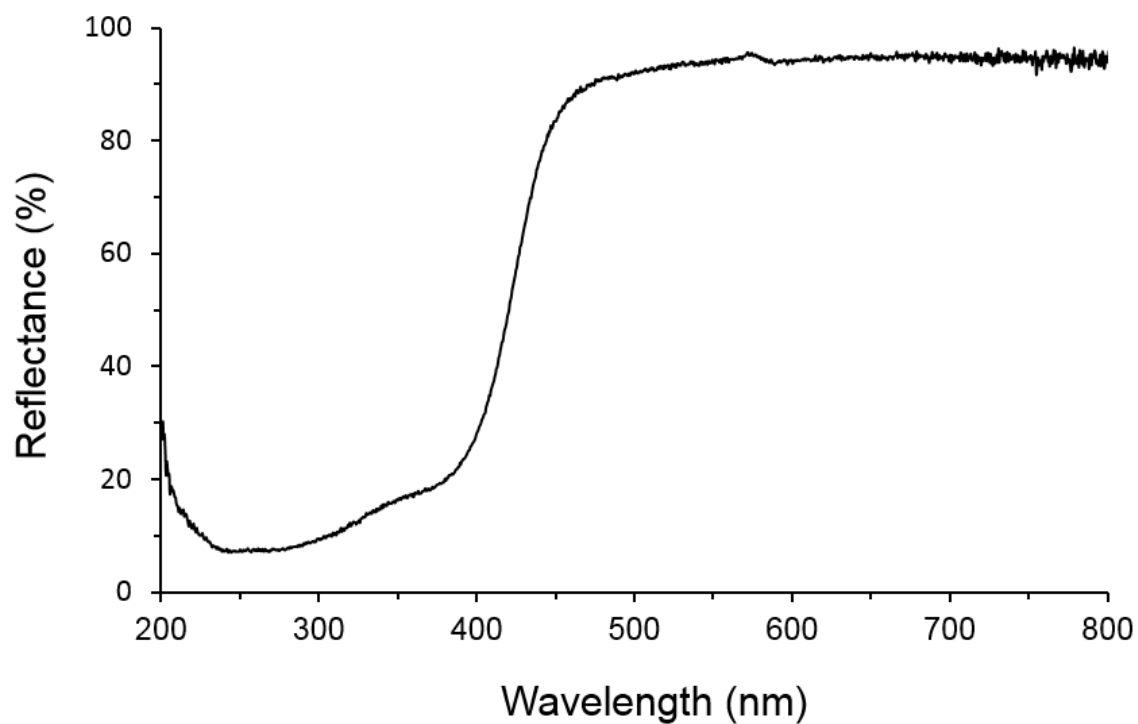

**Figure S4.** UV/vis diffuse reflectance spectrum of **(1)**

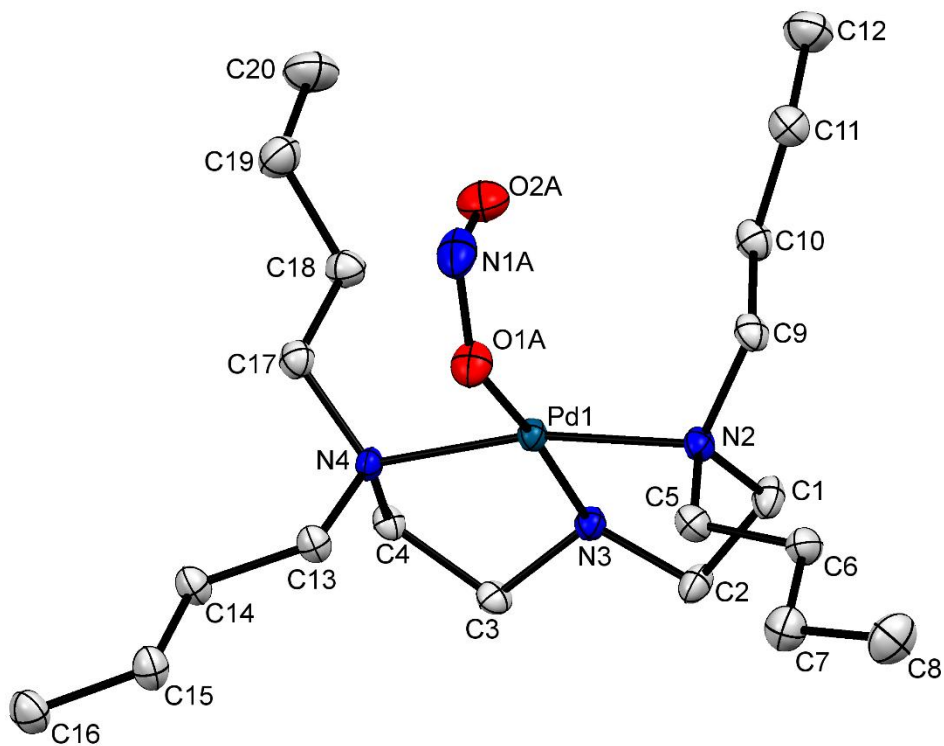

**Figure S5.** Single-crystal X-ray structure for the Pd(II) cation in **(1)** in the metastable state. Ellipsoids shown at 50% probability and hydrogen atoms omitted for clarity

**Table S1.** Nitro : nitrito occupancy ratios as a function of irradiation time at 100 K. 0 – 60 min irradiation ( $\lambda = 400$  nm) and occupancies freely refined from single-crystal X-ray diffraction data

| Irradiation Time (min) | Nitro-( $\eta^1$ - <u>N</u> O <sub>2</sub> ) Occupancy | Nitrito-( $\eta^1$ - <u>O</u> NO) Occupancy |
|------------------------|--------------------------------------------------------|---------------------------------------------|
| 0                      | 1.00                                                   | 0.00                                        |
| 1                      | 0.75                                                   | 0.25                                        |
| 2                      | 0.55                                                   | 0.45                                        |
| 5                      | 0.20                                                   | 0.80                                        |
| 10                     | 0.09                                                   | 0.91                                        |
| 15                     | 0.00                                                   | 1.00                                        |
| 60                     | 0.00                                                   | 1.00                                        |

**Table S2.** Nitro : nitrito occupancy ratios as a function of temperature after 60 min steady-state photo-excitation (MS limit search). Occupancies freely refined from single-crystal X-ray diffraction data

| Temperature (K) | Nitro-( $\eta^1$ - <u>N</u> O <sub>2</sub> ) Occupancy | Nitrito-( $\eta^1$ - <u>O</u> NO) Occupancy |
|-----------------|--------------------------------------------------------|---------------------------------------------|
| 100             | 0.00                                                   | 1.00                                        |
| 150             | 0.00                                                   | 1.00                                        |
| 180             | 0.00                                                   | 1.00                                        |
| 200             | 0.00                                                   | 1.00                                        |
| 220             | 0.71                                                   | 0.29                                        |
| 240             | 1.00                                                   | 0.00                                        |
| 250             | 1.00                                                   | 0.00                                        |
| 260             | 1.00                                                   | 0.00                                        |

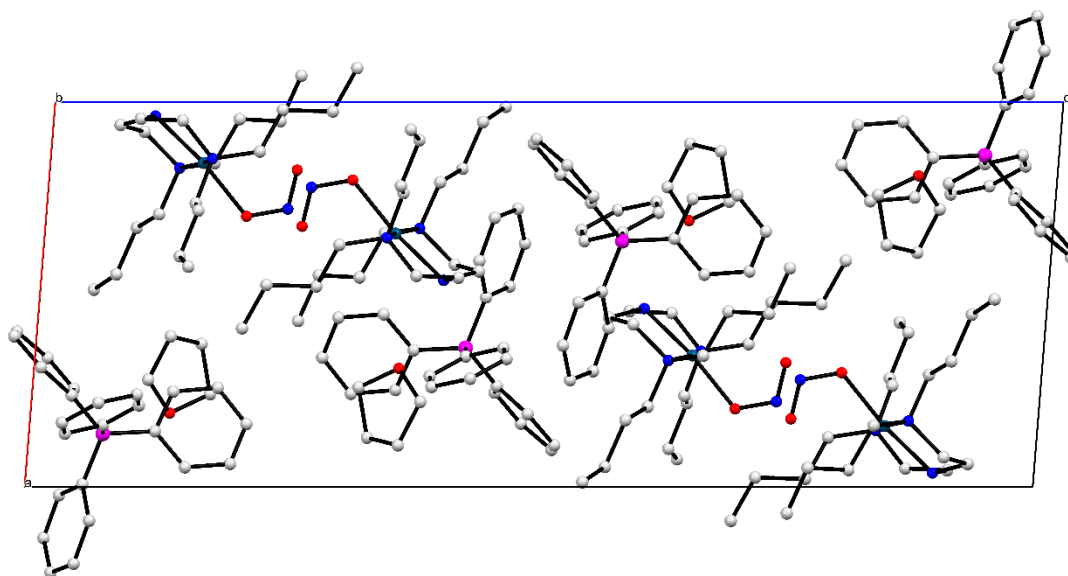

**Figure S6.** Single-crystal packing diagram (one unit cell) for the MS structure of **(1)**, viewed along the crystallographic *b*-axis, *c*-axis horizontal

## References

1. C. F. Macrae, I. J. Bruno, J. A. Chisholm, P. R. Edgington, P. McCabe, E. Pidcock, L. Rodriguez-Monge, R. Taylor, J. van de Streek and P. A. Wood, *Journal of Applied Crystallography*, 2008, **41**, 466-470.
2. J. J. McKinnon, A. S. Mitchell and M. A. Spackman, *Chemistry – A European Journal*, 1998, **4**, 2136-2141.
3. J. J. McKinnon, M. A. Spackman and A. S. Mitchell, *Acta Crystallographica Section B*, 2004, **60**, 627-668.
